# Supplementary material
Source: Royal Society of Chemistry journal article supplement (doi:10.1039/d5an01314c)

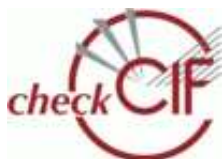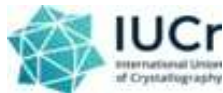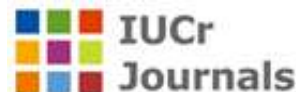

## checkCIF/PLATON report

Structure factors have been supplied for datablock(s) SB1\_autored

THIS REPORT IS FOR GUIDANCE ONLY. IF USED AS PART OF A REVIEW PROCEDURE FOR PUBLICATION, IT SHOULD NOT REPLACE THE EXPERTISE OF AN EXPERIENCED CRYSTALLOGRAPHIC REFEREE.

No syntax errors found.      CIF dictionary      Interpreting this report

### Datablock: SB1\_autored

---

|                        |                      |                      |             |
|------------------------|----------------------|----------------------|-------------|
| Bond precision:        | C-C = 0.0074 Å       | Wavelength=1.54184   |             |
| Cell:                  | a=22.7557(3)         | b=10.3435(2)         | c=8.1124(1) |
|                        | alpha=90             | beta=91.147(1)       | gamma=90    |
| Temperature:           | 293 K                |                      |             |
|                        | Calculated           | Reported             |             |
| Volume                 | 1909.06(5)           | 1909.06(5)           |             |
| Space group            | C c                  | C 1 c 1              |             |
| Hall group             | C -2yc               | C -2yc               |             |
| Moiety formula         | C21 H15 B F2 N2 O2 S | C21 H15 B F2 N2 O2 S |             |
| Sum formula            | C21 H15 B F2 N2 O2 S | C21 H15 B F2 N2 O2 S |             |
| Mr                     | 408.22               | 408.22               |             |
| Dx, g cm <sup>-3</sup> | 1.420                | 1.420                |             |
| Z                      | 4                    | 4                    |             |
| Mu (mm <sup>-1</sup> ) | 1.856                | 1.856                |             |
| F000                   | 840.0                | 840.0                |             |
| F000'                  | 843.99               |                      |             |
| h, k, lmax             | 28, 12, 10           | 28, 12, 10           |             |
| Nref                   | 3766 [ 1886 ]        | 2958                 |             |
| Tmin, Tmax             | 0.752, 0.757         | 0.584, 1.000         |             |
| Tmin'                  | 0.657                |                      |             |

Correction method= # Reported T Limits: Tmin=0.584 Tmax=1.000  
AbsCorr = MULTI-SCAN

Data completeness= 1.57/0.79                      Theta(max)= 72.114

R(reflections)= 0.0452( 2731)

wR2(reflections)=  
0.1234( 2958)

S = 1.129

Npar= 263

---

The following ALERTS were generated. Each ALERT has the format

**test-name\_ALERT\_alert-type\_alert-level.**

Click on the hyperlinks for more details of the test.

---

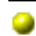

#### Alert level C

PLAT340\_ALERT\_3\_C Low Bond Precision on C-C Bonds ..... 0.00743 Ang.

---

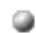

#### Alert level G

PLAT199\_ALERT\_1\_G Reported \_cell\_measurement\_temperature ..... (K)                      293 Check  
PLAT200\_ALERT\_1\_G Reported \_diffrn\_ambient\_temperature ..... (K)                      293 Check  
PLAT850\_ALERT\_4\_G Check Flack Parameter Exact Value 0.00 with s.u.                      0.02 Check  
PLAT912\_ALERT\_4\_G Missing # of FCF Reflections Above STh/L= 0.600                      6 Note  
PLAT915\_ALERT\_3\_G No Flack x Check Done: Low Friedel Pair Coverage                      57 %  
PLAT933\_ALERT\_2\_G Number of HKL-OMIT Records in Embedded .res File                      10 Note  
                  -12 8 4, -12 10 3, -8 2 6, -8 10 1, -6 10 1, 11 5 6,  
                  12 4 5, 13 5 4, 13 5 5, 14 4 4,  
PLAT969\_ALERT\_5\_G The 'Henn et al.' R-Factor-gap value .....                      2.087 Note  
                  Predicted wR2: Based on SigI\*\*2 5.91 or SHELX Weight 10.93  
PLAT978\_ALERT\_2\_G Number C-C Bonds with Positive Residual Density.                      1 Info

---

- 0 **ALERT level A** = Most likely a serious problem - resolve or explain  
0 **ALERT level B** = A potentially serious problem, consider carefully  
1 **ALERT level C** = Check. Ensure it is not caused by an omission or oversight  
8 **ALERT level G** = General information/check it is not something unexpected

- 2 ALERT type 1 CIF construction/syntax error, inconsistent or missing data  
2 ALERT type 2 Indicator that the structure model may be wrong or deficient  
2 ALERT type 3 Indicator that the structure quality may be low  
2 ALERT type 4 Improvement, methodology, query or suggestion  
1 ALERT type 5 Informative message, check
- 

### Validation response form

Please find below a validation response form (VRF) that can be filled in and pasted into your CIF.

```
# start Validation Reply Form
_vrf_PLAT340_SBI_autored
;
PROBLEM: Low Bond Precision on C-C Bonds ..... 0.00743 Ang.
RESPONSE: ...
;
# end Validation Reply Form
```

---

It is advisable to attempt to resolve as many as possible of the alerts in all categories. Often the minor alerts point to easily fixed oversights, errors and omissions in your CIF or refinement strategy, so attention to these fine details can be worthwhile. It is up to the individual to critically assess their own results and, if necessary, seek expert advice.

PLATON version of 26/09/2025; check.def file version of 20/09/2025

## duplicate check

No duplication found

Datablock SB1\_autored - ellipsoid plot

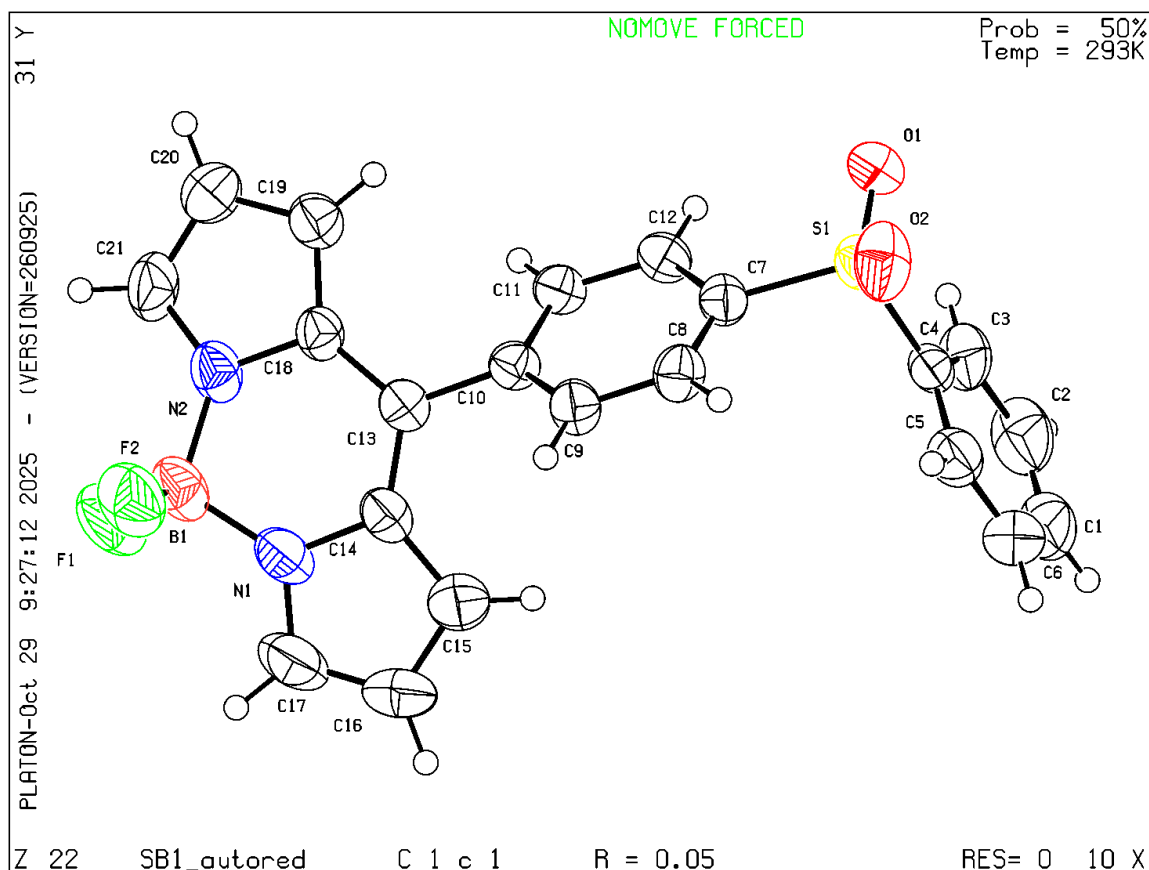

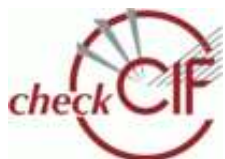

## checkCIF/PLATON report

Structure factors have been supplied for datablock(s) SB2\_auto

THIS REPORT IS FOR GUIDANCE ONLY. IF USED AS PART OF A REVIEW PROCEDURE FOR PUBLICATION, IT SHOULD NOT REPLACE THE EXPERTISE OF AN EXPERIENCED CRYSTALLOGRAPHIC REFEREE.

No syntax errors found.      CIF dictionary      Interpreting this report

### Datablock: SB2\_auto

---

|                        |                      |                      |              |
|------------------------|----------------------|----------------------|--------------|
| Bond precision:        | C-C = 0.0037 Å       | Wavelength=1.54184   |              |
| Cell:                  | a=23.4041 (2)        | b=10.5262 (1)        | c=8.3998 (1) |
|                        | alpha=90             | beta=96.483 (1)      | gamma=90     |
| Temperature:           | 293 K                |                      |              |
|                        | Calculated           | Reported             |              |
| Volume                 | 2056.11 (4)          | 2056.11 (4)          |              |
| Space group            | C c                  | C 1 c 1              |              |
| Hall group             | C -2yc               | C -2yc               |              |
| Moiety formula         | C22 H17 B F2 N2 O2 S | C22 H17 B F2 N2 O2 S |              |
| Sum formula            | C22 H17 B F2 N2 O2 S | C22 H17 B F2 N2 O2 S |              |
| Mr                     | 422.25               | 422.24               |              |
| Dx, g cm <sup>-3</sup> | 1.364                | 1.364                |              |
| Z                      | 4                    | 4                    |              |
| Mu (mm <sup>-1</sup> ) | 1.741                | 1.741                |              |
| F000                   | 872.0                | 872.0                |              |
| F000'                  | 876.06               |                      |              |
| h, k, lmax             | 28, 12, 10           | 28, 12, 10           |              |
| Nref                   | 4046 [ 2026]         | 3168                 |              |
| Tmin, Tmax             | 0.677, 0.718         | 0.826, 1.000         |              |
| Tmin'                  | 0.606                |                      |              |

Correction method= # Reported T Limits: Tmin=0.826 Tmax=1.000  
AbsCorr = MULTI-SCAN

Data completeness= 1.56/0.78                      Theta(max)= 72.028

R(reflections)= 0.0257( 3093)

wR2(reflections)=  
0.0676( 3168)

S = 1.018

Npar= 274

---

The following ALERTS were generated. Each ALERT has the format

**test-name\_ALERT\_alert-type\_alert-level.**

Click on the hyperlinks for more details of the test.

---

● **Alert level C**

|                   |                       |                                           |        |       |
|-------------------|-----------------------|-------------------------------------------|--------|-------|
| PLAT241_ALERT_2_C | High                  | 'MainMol' Ueq as Compared to Neighbors of | C21    | Check |
| PLAT242_ALERT_2_C | Low                   | 'MainMol' Ueq as Compared to Neighbors of | C2     | Check |
| PLAT987_ALERT_1_C | The Flack x is >> 0 - | Do a BASF/TWIN Refinement                 | Please | Check |

---

● **Alert level G**

|                   |                                                  |         |                 |        |
|-------------------|--------------------------------------------------|---------|-----------------|--------|
| PLAT142_ALERT_4_G | s.u. on b - Axis Small or Missing .....          | 0.00010 | Ang.            |        |
| PLAT199_ALERT_1_G | Reported _cell_measurement_temperature .....     | 293     | Check           | (K)    |
| PLAT200_ALERT_1_G | Reported _diffrn_ambient_temperature .....       | 293     | Check           | (K)    |
| PLAT650_ALERT_4_G | SWAT Instruction Used to Model Solvent Disorder  |         | !               | Report |
| PLAT720_ALERT_4_G | Number of Unusual/Non-Standard Labels .....      | 1       | Note            |        |
|                   | S01                                              |         |                 |        |
| PLAT912_ALERT_4_G | Missing # of FCF Reflections Above STh/L=        | 0.600   | 3               | Note   |
| PLAT915_ALERT_3_G | No Flack x Check Done: Low Friedel Pair Coverage |         | 57              | %      |
| PLAT969_ALERT_5_G | The 'Henn et al.' R-Factor-gap value .....       | 3.457   | Note            |        |
|                   | Predicted wR2: Based on SigI**2                  | 1.96    | or SHELX Weight | 6.64   |
| PLAT978_ALERT_2_G | Number C-C Bonds with Positive Residual Density. |         | 0               | Info   |

---

0 **ALERT level A** = Most likely a serious problem - resolve or explain  
0 **ALERT level B** = A potentially serious problem, consider carefully  
3 **ALERT level C** = Check. Ensure it is not caused by an omission or oversight  
9 **ALERT level G** = General information/check it is not something unexpected

3 ALERT type 1 CIF construction/syntax error, inconsistent or missing data  
3 ALERT type 2 Indicator that the structure model may be wrong or deficient  
1 ALERT type 3 Indicator that the structure quality may be low  
4 ALERT type 4 Improvement, methodology, query or suggestion  
1 ALERT type 5 Informative message, check

---

## Validation response form

Please find below a validation response form (VRF) that can be filled in and pasted into your CIF.

```
# start Validation Reply Form
_vrf_PLAT241_SB2_auto
;
PROBLEM: High 'MainMol' Ueq as Compared to Neighbors of                      C21 Check
RESPONSE: ...
;
_vrf_PLAT242_SB2_auto
```

```
;
PROBLEM: Low      'MainMol' Ueq as Compared to Neighbors of          C2 Check
RESPONSE: ...
;
_vrf_PLAT987_SB2_auto
;
PROBLEM: The Flack x is >> 0 - Do a BASF/TWIN Refinement          Please Check
RESPONSE: ...
;
# end Validation Reply Form
```

---

It is advisable to attempt to resolve as many as possible of the alerts in all categories. Often the minor alerts point to easily fixed oversights, errors and omissions in your CIF or refinement strategy, so attention to these fine details can be worthwhile. It is up to the individual to critically assess their own results and, if necessary, seek expert advice.

---

**PLATON version of 26/09/2025; check.def file version of 20/09/2025**

---

## **duplicate check**

**No duplication found**

---

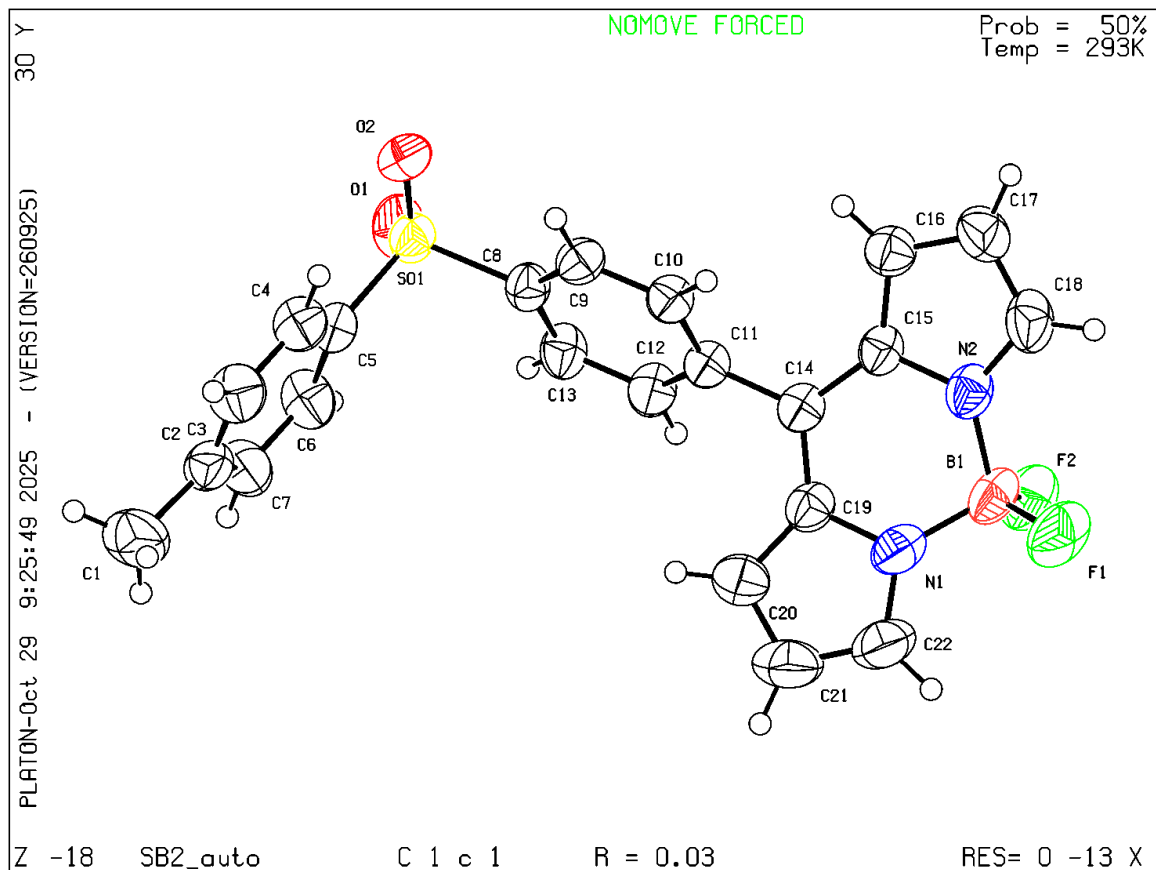

Supplement: d5an01314c1.pdf [file d5an01314c1.pdf]
